# Supplementary material
Source: HighWire-hosted journal article supplement (https://diabetes.diabetesjournals.org/content/suppl/2006/03/28/55.4.919)
Supplement: db0727OnlineAppendixTable1.pdf [file db0727OnlineAppendixTable1.pdf]

**Appendix Table 1. Genotype and allele frequencies for SNPs in *PRKAA2* in case and control samples (Replication samples)**

| SNP ID         | genotype | Replication samples |                 |                      |                        |                      |              |
|----------------|----------|---------------------|-----------------|----------------------|------------------------|----------------------|--------------|
|                |          | genotype frequency  |                 | p value <sup>a</sup> | minor allele frequency | p value <sup>b</sup> |              |
|                |          | Case (n=657)        | Control (n=360) |                      |                        |                      | case/control |
| SNP1 rs2051040 | GG       | 230(0.35)           | 132(0.37)       | 0.05                 | 0.41/0.37              | 0.11                 |              |
|                | GA       | 317(0.48)           | 188(0.52)       |                      |                        |                      |              |
|                | AA       | 110(0.17)           | 40(0.11)        |                      |                        |                      |              |
| SNP2 rs2796495 | GG       | 239(0.36)           | 128(0.36)       | 0.66                 | 0.40/0.40              | 0.86                 |              |
|                | GA       | 306(0.47)           | 177(0.49)       |                      |                        |                      |              |
|                | AA       | 111(0.17)           | 55(0.15)        |                      |                        |                      |              |
| SNP3 rs2143754 | TT       | 212(0.33)           | 96(0.27)        | 0.07                 | 0.44/0.46              | 0.40                 |              |
|                | TC       | 310(0.47)           | 197(0.55)       |                      |                        |                      |              |
|                | CC       | 134(0.20)           | 67(0.18)        |                      |                        |                      |              |
| SNP4 rs1418442 | AA       | 379(0.58)           | 220(0.61)       | 0.34                 | 0.24/0.23              | 0.59                 |              |
|                | AG       | 236(0.36)           | 114(0.32)       |                      |                        |                      |              |
|                | GG       | 40(0.06)            | 26(0.07)        |                      |                        |                      |              |
| SNP5 rs932447  | AA       | 376(0.58)           | 232(0.64)       | 0.12                 | 0.24/0.20              | 0.06                 |              |
|                | AG       | 238(0.37)           | 111(0.31)       |                      |                        |                      |              |
|                | GG       | 36(0.05)            | 17(0.05)        |                      |                        |                      |              |
| SNP6 rs3738568 | TT       | 474(0.72)           | 254(0.71)       | 0.61                 | 0.15/0.15              | 0.75                 |              |
|                | TC       | 170(0.26)           | 101(0.28)       |                      |                        |                      |              |
|                | CC       | 13(0.02)            | 5(0.01)         |                      |                        |                      |              |

a)b) p values for genotype frequency<sup>(a)</sup> and allele frequency<sup>(b)</sup>.
