# Supplementary material
Source: HighWire-hosted journal article supplement (https://diabetes.diabetesjournals.org/content/suppl/2006/03/28/55.4.919)
Supplement: db0727OnlineAppendixTable3.pdf [file db0727OnlineAppendixTable3.pdf]

**Appendix Table 3. Genotype and allele frequencies for SNPs in *PRKAA2* in case and control samples (Joint samples)**

|        |           | Joint (initial + replication + Hiroshima ) samples |                    |                      |                                        |                      |      |
|--------|-----------|----------------------------------------------------|--------------------|----------------------|----------------------------------------|----------------------|------|
| SNP ID | genotype  | genotype frequency                                 |                    | p value <sup>a</sup> | minor allele frequency<br>case/control | p value <sup>b</sup> |      |
|        |           | Case<br>(n=1205)                                   | Control<br>(n=824) |                      |                                        |                      |      |
| SNP1   | rs2051040 | GG                                                 | 435 (0.36)         | 314 (0.38)           | 0.083                                  | 0.40/0.38            | 0.07 |
|        |           | GA                                                 | 558 (0.46)         | 396 (0.48)           |                                        |                      |      |
|        |           | AA                                                 | 211 (0.18)         | 114 (0.14)           |                                        |                      |      |
| SNP2   | rs2796495 | GG                                                 | 442 (0.37)         | 276 (0.33)           | 0.33                                   | 0.40/0.41            | 0.22 |
|        |           | GA                                                 | 561 (0.47)         | 405 (0.49)           |                                        |                      |      |
|        |           | AA                                                 | 200 (0.16)         | 142 (0.17)           |                                        |                      |      |
| SNP3   | rs2143754 | TT                                                 | 395 (0.33)         | 237 (0.29)           | 0.12                                   | 0.43/0.45            | 0.16 |
|        |           | TC                                                 | 572 (0.48)         | 424 (0.51)           |                                        |                      |      |
|        |           | CC                                                 | 234 (0.19)         | 163 (0.20)           |                                        |                      |      |
| SNP4   | rs1418442 | AA                                                 | 690 (0.57)         | 472 (0.57)           | 0.87                                   | 0.24/0.25            | 0.78 |
|        |           | AG                                                 | 432 (0.36)         | 293 (0.36)           |                                        |                      |      |
|        |           | GG                                                 | 79 (0.07)          | 59 (0.07)            |                                        |                      |      |
| SNP5   | rs932447  | AA                                                 | 697 (0.58)         | 505 (0.61)           | 0.39                                   | 0.23/0.22            | 0.22 |
|        |           | AG                                                 | 441 (0.37)         | 281 (0.34)           |                                        |                      |      |
|        |           | GG                                                 | 58 (0.05)          | 38 (0.05)            |                                        |                      |      |
| SNP6   | rs3738568 | TT                                                 | 884 (0.73)         | 590 (0.71)           | 0.63                                   | 0.14/0.15            | 0.43 |
|        |           | TC                                                 | 296 (0.25)         | 218 (0.27)           |                                        |                      |      |
|        |           | CC                                                 | 24 (0.02)          | 16 (0.02)            |                                        |                      |      |

a)b) p values for genotype frequency(<sup>a</sup>) and allele frequency(<sup>b</sup>).
