# Supplementary material
Source: HighWire-hosted journal article supplement (https://diabetes.diabetesjournals.org/content/suppl/2006/03/28/55.4.919)
Supplement: db0727OnlineAppendixTable4.pdf [file db0727OnlineAppendixTable4.pdf]

## Appendix Table 4. Complete Haplotype analyses of initial and replication samples

### 1) Initial samples

| Haplotype | Haplotype frequency |                    |                        |
|-----------|---------------------|--------------------|------------------------|
|           | Case<br>(n=192)     | Control<br>(n=272) | permutation<br>p-value |
| GGTAAT    | 0.14                | 0.18               | 0.162                  |
| AGTAAT    | 0.38                | 0.29               | 0.009                  |
| GACGGT    | 0.16                | 0.19               | 0.256                  |
| GACAAC    | 0.08                | 0.11               | 0.096                  |
| AGCAAT    | 0.022               | 0.052              | 0.049                  |
| GACAAT    | 0.021               | 0.049              | 0.035                  |
| GGCAAT    | 0.028               | 0.026              | 0.807                  |
| GATGGT    | 0.013               | 0.022              | 0.297                  |
| GACGAT    | 0.024               | 0.008              | 0.117                  |
| GATAAT    | 0.017               | 0.004              | 0.284                  |
| GATAAC    | 0.012               | 0.021              | 0.262                  |
| GACAGT    | 0.018               | 0.001              | 0.037                  |
| GATAGT    | 0.018               | 0.000              | #                      |
| GGCGAT    | 0.016               | 0.000              | 0.002                  |
| GGCAAC    | 0.013               | 0.000              | #                      |
| AGTGAT    | 0.008               | 0.006              | 0.727                  |
| AGCAAC    | 0.000               | 0.006              | 0.327                  |
| GACGAC    | 0.006               | 0.004              | 0.638                  |
| AATAAT    | 0.006               | 0.003              | 0.288                  |
| GGCGGT    | 0.005               | 0.000              | 0.101                  |
| AACGGT    | 0.000               | 0.006              | 0.179                  |
| AGTAGT    | 0.000               | 0.004              | 0.44                   |
| GGCAGT    | 0.004               | 0.000              | 0.007                  |
| AACAAC    | 0.000               | 0.002              | 0.428                  |
| AGTAAC    | 0.000               | 0.002              | 0.457                  |
| GGTGGT    | 0.003               | 0.000              | 0.004                  |
| GGTAGT    | 0.000               | 0.001              | 0.449                  |
| GATGGC    | 0.000               | 0.002              | 0.737                  |
| GGTGAT    | 0.000               | 0.009              | 0.16                   |
| AGCGAT    | 0.000               | 0.001              | 0.571                  |
| GGCGGC    | 0.000               | 0.002              | 0.173                  |
| GATGAC    | 0.002               | 0.000              | 0.267                  |
| GATGAT    | 0.000               | 0.002              | 0.3                    |

### 2) Replication samples

| Haplotype | Haplotype frequency |                    |                        |
|-----------|---------------------|--------------------|------------------------|
|           | Case<br>(n=657)     | Control<br>(n=360) | permutation<br>p-value |
| GGTAAT    | 0.14                | 0.17               | 0.227                  |
| AGTAAT    | 0.36                | 0.32               | 0.021                  |
| GACGGT    | 0.20                | 0.19               | 0.495                  |
| GACAAC    | 0.12                | 0.12               | 0.481                  |
| AGCAAT    | 0.021               | 0.071              | #                      |
| GACAAT    | 0.033               | 0.031              | 0.709                  |
| GATAAT    | 0.031               | 0.008              | 0.006                  |
| AGCGGT    | 0.014               | 0.000              | 0.003                  |
| GGCGGT    | 0.013               | 0.000              | 0.008                  |
| AGCAAC    | 0.010               | 0.010              | 0.919                  |
| AGCAAT    | 0.008               | 0.017              | 0.068                  |
| GGCAAC    | 0.007               | 0.000              | 0.164                  |
| GATGGT    | 0.005               | 0.002              | 0.392                  |
| AGTGAT    | 0.003               | 0.009              | 0.143                  |
| AATGGC    | 0.003               | 0.000              | 0.189                  |
| GGTAAC    | 0.002               | 0.003              | 0.666                  |
| GATAAC    | 0.001               | 0.000              | 0.435                  |
| GATAGT    | 0.001               | 0.000              | 0.345                  |
| GGTGAC    | 0.001               | 0.000              | 0.814                  |
| GACGGC    | 0.001               | 0.010              | 0.002                  |
| GGTAGT    | 0.001               | 0.000              | 0.379                  |
| GACGAT    | 0.000               | 0.000              | 0.96                   |
| AACAAC    | 0.000               | 0.011              | #                      |
| GACGAC    | 0.000               | 0.000              | 0.278                  |
| GGTGAT    | 0.000               | 0.016              | 0                      |
| GATAAC    | 0.000               | 0.002              | #                      |
| AACGAT    | 0.000               | 0.000              | 0.998                  |
| AATGGC    | 0.000               | 0.002              | 0.007                  |
| AACGGT    | 0.000               | 0.006              | #                      |
| AATAAT    | 0.000               | 0.003              | 0.019                  |
| GGTGGT    | 0.000               | 0.003              | #                      |
| AATGGT    | 0.000               | 0.001              | 0.092                  |
| GACGAC    | 0.000               | 0.001              | 0.171                  |

#: <0.001
