# Supplementary material
Source: HighWire-hosted journal article supplement (https://diabetes.diabetesjournals.org/content/suppl/2006/03/28/55.4.919)
Supplement: db0727OnlineAppendixTable4continued.pdf [file db0727OnlineAppendixTable4continued.pdf]

## Appendix Table 4 (continued). Complete Haplotype analyses of Hiroshima and joint samples

### 3) Hiroshima samples

| Haplotype | Haplotype frequency |                 |                     |
|-----------|---------------------|-----------------|---------------------|
|           | Case (n=356)        | Control (n=192) | permutation p-value |
| GGTAAT    | 0.15                | 0.13            | 0.272               |
| AGTAAT    | 0.35                | 0.26            | 0.007               |
| GACGGT    | 0.19                | 0.16            | 0.237               |
| GACAAC    | 0.11                | 0.08            | 0.232               |
| AGCAAT    | 0.009               | 0.101           | #                   |
| GACAAT    | 0.036               | 0.028           | 0.59                |
| GACGAT    | 0.023               | 0.007           | 0.132               |
| GGCAAT    | 0.023               | 0.033           | 0.375               |
| GGTGAT    | 0.016               | 0.012           | 0.798               |
| AGCAAC    | 0.015               | 0.002           | 0.138               |
| GATAAC    | 0.012               | 0.038           | 0.039               |
| GATAAT    | 0.010               | 0.031           | 0.021               |
| GATAGT    | 0.009               | 0.000           | 0.193               |
| GACAGT    | 0.008               | 0.000           | 0.147               |
| AGTGAT    | 0.007               | 0.006           | 0.775               |
| AGTAGT    | 0.006               | 0.000           | 0.137               |
| AGCGGT    | 0.005               | 0.000           | 0.073               |
| AACGGT    | 0.003               | 0.013           | 0.065               |
| GGCGAT    | 0.003               | 0.001           | 0.67                |
| GACGAC    | 0.003               | 0.000           | 0.489               |
| AGCGAT    | 0.003               | 0.000           | 0.529               |
| GGTAAC    | 0.002               | 0.000           | 0.121               |
| GACGGC    | 0.002               | 0.008           | 0.252               |
| AACGAC    | 0.002               | 0.000           | 0.348               |
| GGTAGT    | 0.002               | 0.000           | 0.352               |
| GGCGGT    | 0.001               | 0.000           | 0.299               |
| GGTAGC    | 0.001               | 0.000           | 0.234               |
| AACGGC    | 0.001               | 0.000           | 0.115               |
| GGCAGT    | 0.001               | 0.000           | 0.146               |
| GATGAT    | 0.001               | 0.013           | 0.003               |
| AGTAAC    | 0.000               | 0.015           | 0.001               |
| GATGGC    | 0.000               | 0.000           | 0.555               |
| GGCAAC    | 0.000               | 0.004           | 0.035               |
| GATGGT    | 0.000               | 0.049           | #                   |
| GATGAC    | 0.000               | 0.007           | 0.159               |

### 4) Joint samples

| Haplotype | Haplotype frequency |                 |                     |
|-----------|---------------------|-----------------|---------------------|
|           | Case (n=1205)       | Control (n=824) | permutation p-value |
| GGTAAT    | 0.15                | 0.16            | 0.1175              |
| AGTAAT    | 0.36                | 0.30            | 0.0001              |
| GACGGT    | 0.19                | 0.18            | 0.6447              |
| GACAAC    | 0.11                | 0.11            | 0.6643              |
| GGCAAT    | 0.024               | 0.049           | 0.0005              |
| GACAAT    | 0.033               | 0.035           | 0.6834              |
| AGCAAT    | 0.010               | 0.047           | ##                  |
| GATAAT    | 0.022               | 0.014           | 0.1466              |
| GATGGT    | 0.002               | 0.027           | ##                  |
| AGCAAC    | 0.011               | 0.008           | 0.4791              |
| GACGAT    | 0.010               | 0.006           | 0.1837              |
| GATAAC    | 0.006               | 0.011           | 0.1301              |
| GGTGAT    | 0.008               | 0.005           | 0.2613              |
| AGTGAT    | 0.005               | 0.008           | 0.4331              |
| AGCGGT    | 0.009               | 0.000           | 0.0008              |
| GGCGGT    | 0.009               | 0.000           | 0.0025              |
| GATAGT    | 0.006               | 0.000           | 0.008               |
| AACGGT    | 0.002               | 0.007           | 0.0524              |
| GGCAAC    | 0.006               | 0.001           | 0.2314              |
| GACAGT    | 0.005               | 0.001           | 0.0566              |
| AGTAAC    | 0.001               | 0.005           | 0.0219              |
| GACGAC    | 0.002               | 0.002           | 0.5667              |
| AGTAGT    | 0.002               | 0.001           | 0.6689              |
| GGCGAT    | 0.002               | 0.000           | 0.3151              |
| GACGGC    | 0.002               | 0.002           | 0.742               |
| AACAAC    | 0.000               | 0.003           | 0.0024              |
| AGCGAT    | 0.001               | 0.000           | 0.4754              |
| AATAAT    | 0.001               | 0.001           | 0.6757              |
| GATGAC    | 0.000               | 0.002           | 0.9122              |
| GGTAAC    | 0.001               | 0.001           | 0.9136              |
| GGTAGT    | 0.000               | 0.001           | 0.771               |
| GGTGGT    | 0.001               | 0.000           | 0.2668              |
| GGCAGT    | 0.001               | 0.000           | 0.3936              |
| GGTGAC    | 0.000               | 0.001           | ##                  |
| GGCGGC    | 0.000               | 0.001           | 0.2518              |
| AACGAT    | 0.000               | 0.001           | 0.0164              |

#: <0.001 ##: <0.0001
